# Supplementary material
Source: publisher site journal article supplement (https://zookeys.pensoft.net/article/87635/download/suppl/34/)
Supplement: Supplementary file

## Suppl. material 4

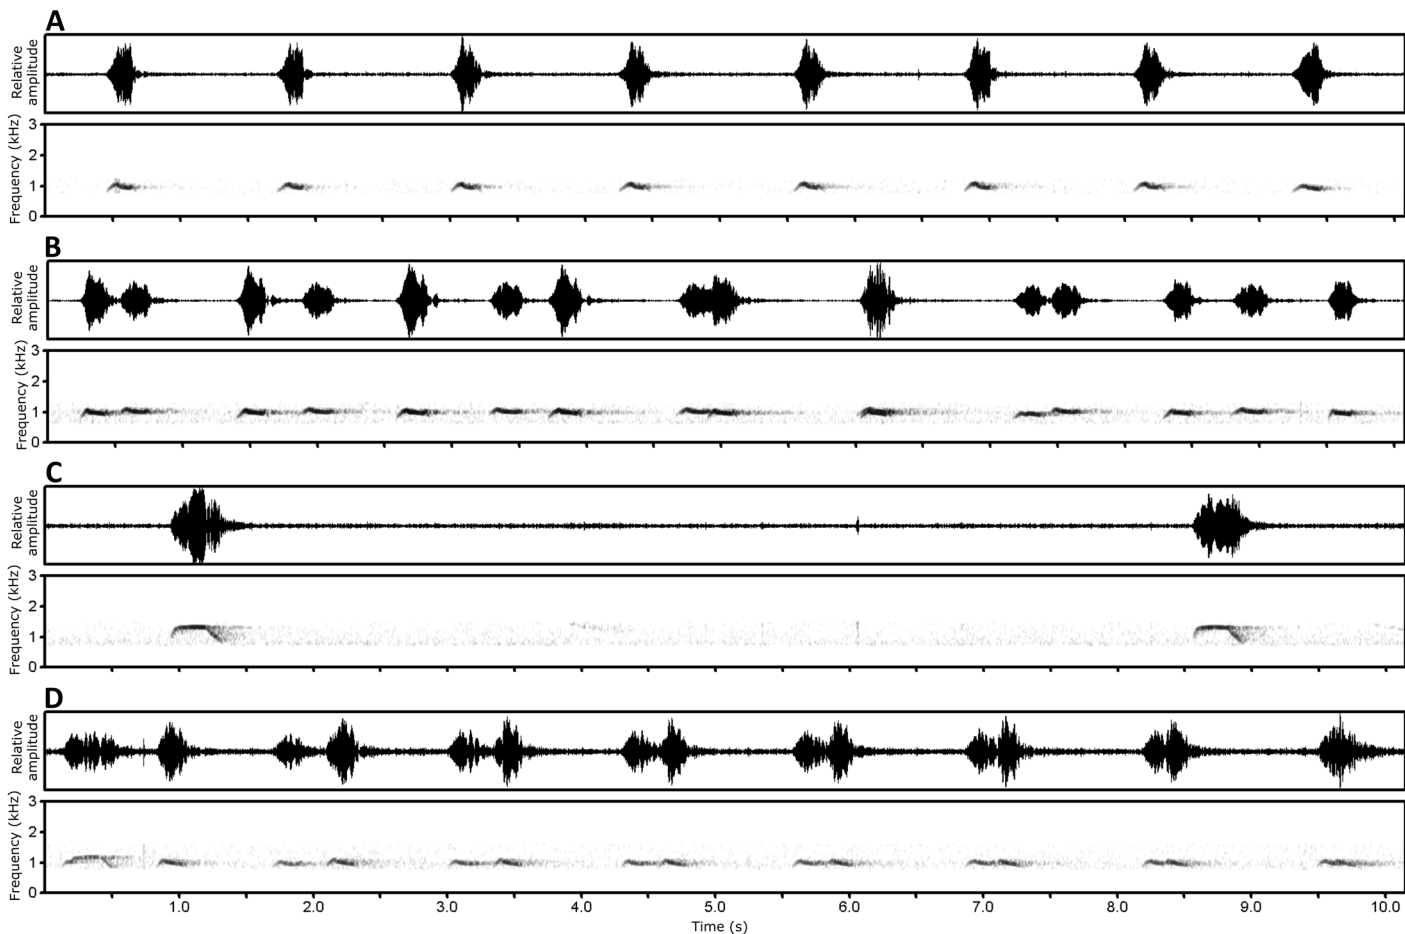

**Figure S2.** Oscillograms and spectrograms of 10s sections of the call of *O. bikegila* sp. nov.: **A** primary call of an individual, recorded on January 20, 2019, XC619448 **B** two different individuals duetting, recorded on July 28, 2018, XC619439 **C** cat-like “kee-a-u” call of one individual, recorded on January 15, 2019, XC619443 **D** two different individuals duetting, in which one emits a cat-like “kee-a-u” call, recorded on January 20, 2019, XC619448. Codes from Xeno-canto.org database.
